# Supplementary figures and images for: Comparison of two codon optimization strategies to enhance recombinant protein production in Escherichia coli
Source: Springer Nature journal article supplement (doi:10.1186/1475-2859-10-15), 2011-01-01

1

2

3

4

5

6

7

8

9

10

45 kDa

30 kDa

← pro-chymosin

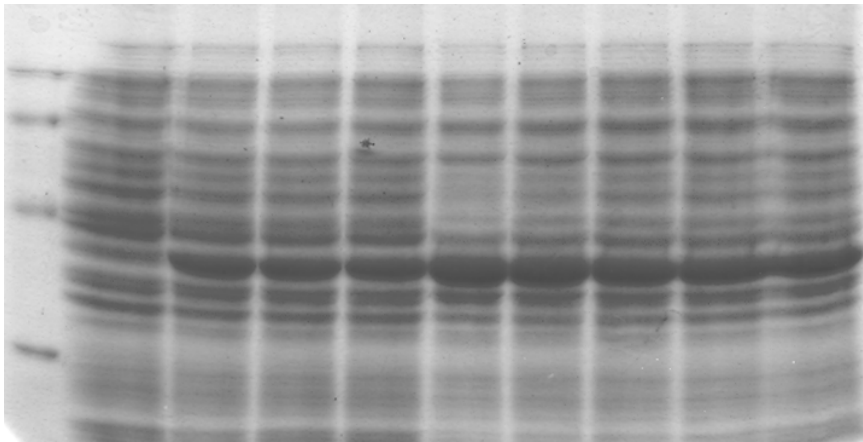

Supplement: 12934_2011_506_MOESM3_ESM.pdf [file 12934_2011_506_MOESM3_ESM.pdf]

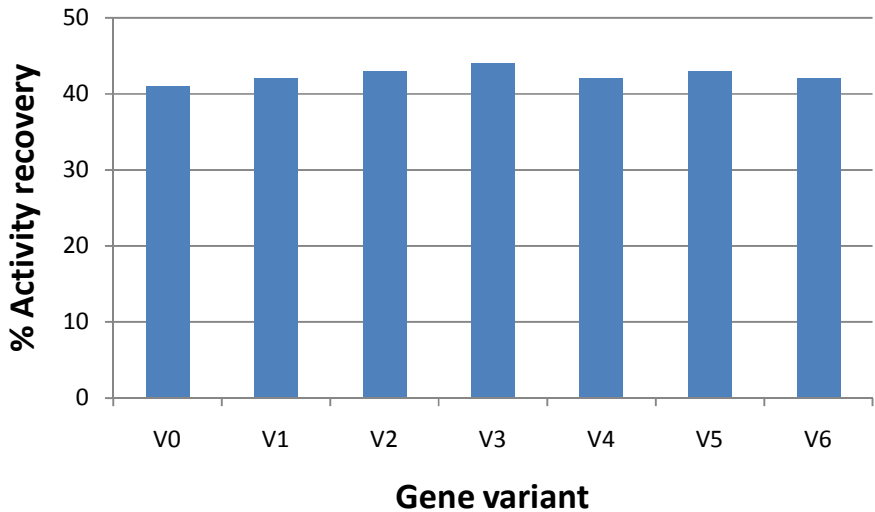

Supplement: 12934_2011_506_MOESM4_ESM.pdf [file 12934_2011_506_MOESM4_ESM.pdf]
